# Supplementary material for: Lupin as Ingredient in Durum Wheat Breadmaking: Physicochemical Properties of Flour Blends and Bread Quality
Source: MDPI journal article supplement (doi:10.3390/foods13050807), 2024-03-06
Supplement: s1 [file s1]

**Table S1.** Cluster membership.

**Cluster Membership**

| Case Number | SAMPLE  | Cluster | Distance |
|-------------|---------|---------|----------|
| 1           | SC      | 1       | .        |
| 2           | LPC 3%  | 2       | 0,000    |
| 3           | LPC 7%  | 3       | 3,209    |
| 4           | LPC 10% | 3       | ,791     |
| 5           | LPC 15% | 3       | 3,273    |
| 6           | LF 3%   | 4       | 2,685    |
| 7           | LF 7%   | 4       | 1,975    |
| 8           | LF 10%  | 4       | 1,135    |
| 9           | LF 15%  | 4       | 3,327    |

**Table S2.** Final cluster centres.

**Final Cluster Centres**

|                                                  | Cluster  |          |         |         |
|--------------------------------------------------|----------|----------|---------|---------|
|                                                  | 1        | 2        | 3       | 4       |
| Zscore: Flour_Polyphenols (mg GAE/g d.m.)        | -1,11685 | -1,09166 | -,60671 | 1,00716 |
| Zscore: Flour_Antioxidant activity (µmol/g d.m.) | -1,34407 | -,82868  | -,45981 | ,88805  |
| Zscore: Flour_WBC                                | -2,02182 | -1,35283 | ,29733  | ,62067  |
| Zscore: Flour_OBC                                | 2,38273  | ,86645   | -,37907 | -,52799 |
| Zscore: Flour_Dough development time (min)       | -,82712  | -,44397  | -,38923 | ,60970  |
| Zscore: Flour_Stability (min)                    | ,86927   | 1,16424  | ,25698  | -,70112 |
| Zscore: Flour_Softening degree (B.U.)            | -1,39713 | -,90968  | -,25339 | ,76675  |
| Zscore: Flour_Water absorption at 500 B.U. (%)   | -1,30327 | -,52131  | -,49959 | ,83083  |
| Zscore: Flour_W                                  | 2,10711  | 1,13494  | -,15241 | -,69621 |
| Zscore: Flour_P/L                                | -,71791  | -,56346  | -,13443 | ,42116  |
| Zscore: Flour_Falling number                     | -1,89917 | -1,14950 | ,51763  | ,37394  |
| Zscore: Bread_Moisture (g/100g)                  | 1,37251  | ,94597   | ,42844  | -,90095 |
| Zscore: Bread_Specific volume (cm3/g)            | 2,39209  | ,71157   | -,60559 | -,32172 |
| Zscore: Bread_Density (g/cm3)                    | -2,36235 | -,68384  | ,62167  | ,29529  |
| Zscore: Bread_Height (mm)                        | 2,30782  | ,72986   | -,67685 | -,25178 |
| Zscore: Bread_Hardness (N)                       | -,44544  | -,59464  | -,91067 | ,94302  |
| Zscore: Bread_Porosity (1-8)*                    | -1,71660 | -1,01436 | -,31211 | ,91682  |
| Zscore: Bread_Polyphenols (mg GAE/g d.m.)        | -1,56628 | -1,07519 | -,32516 | ,90424  |
| Zscore: Bread_Antioxidant activity (µmol/g d.m.) | -1,95907 | -1,05634 | ,00869  | ,74734  |
| Zscore: Bread crumb_Brown index (100-L)          | -,92934  | -1,64583 | -,19129 | ,78726  |
| Zscore: Bread crumb_a*                           | -1,49561 | -1,20854 | -,22682 | ,84615  |

|                                         |          |          |         |         |
|-----------------------------------------|----------|----------|---------|---------|
| Zscore: Bread crumb_b*                  | -1,33437 | -1,38766 | -,17408 | ,81107  |
| Zscore: Bread crust_Brown index (100-L) | -,73218  | -,99356  | -,24151 | ,61257  |
| Zscore: Bread crust_a*                  | 1,54532  | ,99264   | -,87440 | ,02131  |
| Zscore: Bread crust_b*                  | 1,64514  | 1,25655  | -,24633 | -,54068 |
